# Supplementary material
Source: PubMed Central journal article supplement (PMC7930418)

Supplemental Figure for:  
Utility of the Geriatric 8 for the prediction of therapy-related toxicity in older adults with diffuse large B-cell lymphoma  
Shin Lee et al.

**Supplementary figure 1. Associations between the incidence of severe AEs and modified G8 score (n=398) using a model with restricted cubic spline with 4 knots**

The solid line represents the log hazard ratio, and the shaded area is the 95% confidence interval.

AEs, adverse events; G8, Geriatric 8

Shin Lee, Supplementary figure 1, top

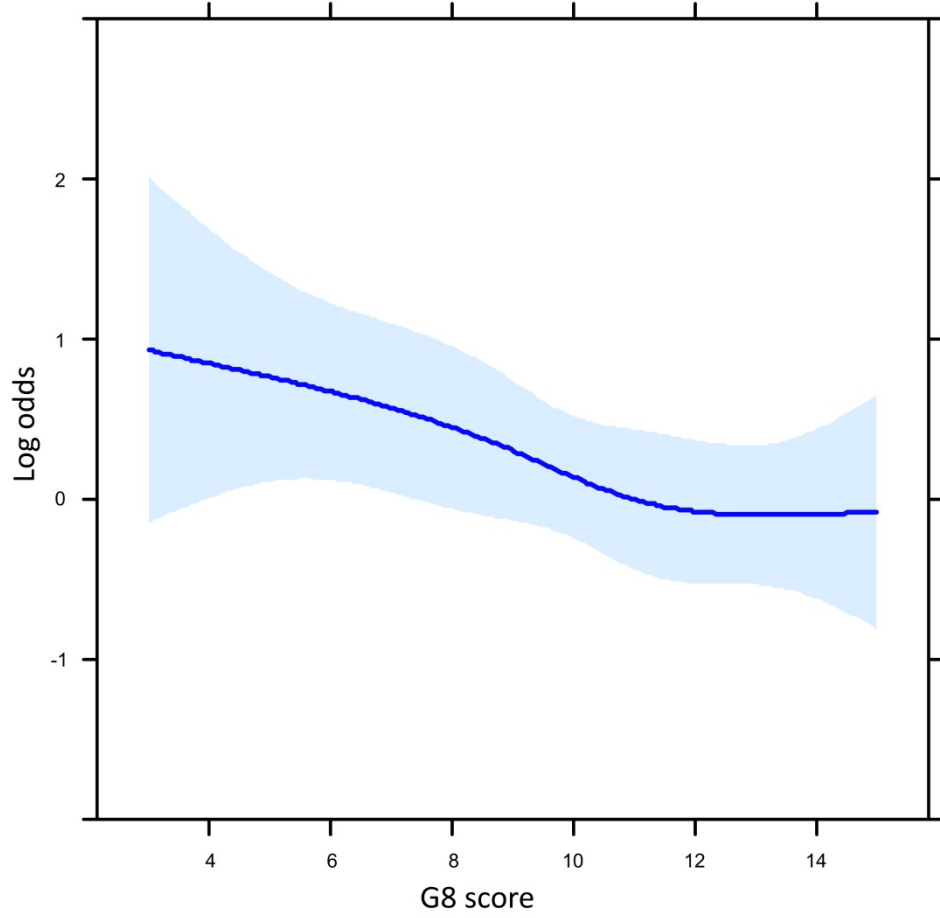

Supplement: ONCO-26-215-s001.pdf [file ONCO-26-215-s001.pdf]
