# Supplementary material
Source: PubMed Central journal article supplement (PMC7930418)
Supplement: ONCO-26-215-s002.pdf [file ONCO-26-215-s002.pdf]

Supplemental Tables for:

Utility of the Geriatric 8 for the prediction of therapy-related toxicity in older adults with diffuse large B-cell lymphoma  
Shin Lee et al.

**Supplementary table 1. Multivariate logistic regression analysis for clinical factors associated with the occurrence of febrile neutropenia**

|                           | IPI                 |                | IPI factors         |                |
|---------------------------|---------------------|----------------|---------------------|----------------|
|                           | OR (95% CI)         | <i>P</i> value | OR (95% CI)         | <i>P</i> value |
| Male sex                  | 1.290 (0.840–1.980) | 0.245          | 1.270 (0.821–1.960) | 0.284          |
| IPI score                 | 1.240 (1.010–1.530) | 0.043          |                     |                |
| Age                       |                     |                | 0.985 (0.948–1.020) | 0.417          |
| ECOG PS $\geq 2$          |                     |                | 1.700 (0.978–2.970) | 0.060          |
| LDH >ULN                  |                     |                | 0.974 (0.581–1.630) | 0.919          |
| Stage $\geq 3$            |                     |                | 1.140 (0.651–1.980) | 0.653          |
| Extranodal sites $\geq 2$ |                     |                | 1.390 (0.851–2.270) | 0.188          |
| Serum albumin (g/dL)      | 0.990 (0.703–1.390) | 0.952          | 0.997 (0.705–1.410) | 0.985          |
| Bulky mass                | 1.790 (1.050–3.040) | 0.032          | 1.730 (1.010–2.980) | 0.047          |
| Total ARDI                | 1.010 (1.000–1.020) | 0.026          | 1.010 (1.000–1.020) | 0.035          |
| G8 score (/point)         | 0.897 (0.827–0.972) | 0.008          | 0.896 (0.819–0.980) | 0.017          |
| CCI score (/point)        | 1.150 (0.997–1.310) | 0.054          | 1.130 (0.987–1.300) | 0.075          |

ARDI, average relative dose intensity; CCI, Charlson Comorbidity Index; CI, confidence interval; ECOG PS, Eastern Cooperative Oncology Group performance status; G8, Geriatric 8; IPI, International Prognostic Index; LDH, lactate dehydrogenase; OR, odds ratio; ULN, upper limit of normal

**Supplementary table 2. Multivariate logistic regression analysis for clinical factors associated with the occurrence of severe non-hematological toxicities**

|                           | IPI                 |                | IPI factors         |                |
|---------------------------|---------------------|----------------|---------------------|----------------|
|                           | OR (95% CI)         | <i>P</i> value | OR (95% CI)         | <i>P</i> value |
| Male sex                  | 1.340 (0.855–2.110) | 0.200          | 1.260 (0.796–1.990) | 0.323          |
| IPI score                 | 1.180 (0.946–1.470) | 0.143          |                     |                |
| Age                       |                     |                | 0.970 (0.933–1.010) | 0.125          |
| ECOG PS $\geq$ 2          |                     |                | 0.883 (0.496–1.570) | 0.672          |
| LDH >ULN                  |                     |                | 0.760 (0.434–1.330) | 0.336          |
| Stage $\geq$ 3            |                     |                | 1.500 (0.806–2.800) | 0.200          |
| Extranodal sites $\geq$ 2 |                     |                | 1.640 (0.985–2.720) | 0.057          |
| Serum albumin (g/dL)      | 0.686 (0.478–0.985) | 0.044          | 0.686 (0.475–0.991) | 0.044          |
| Bulky mass                | 1.830 (1.070–3.140) | 0.027          | 1.710 (0.986–2.970) | 0.056          |
| Total ARDI                | 0.993 (0.986–1.000) | 0.077          | 0.991 (0.984–0.999) | 0.033          |
| G8 score (/point)         | 0.917 (0.843–0.996) | 0.041          | 0.873 (0.794–0.960) | 0.005          |
| CCI score (/point)        | 1.050 (0.910–1.200) | 0.525          | 1.040 (0.905–1.200) | 0.560          |

ARDI, average relative dose intensity; CCI, Charlson Comorbidity Index; CI, confidence interval; ECOG PS, Eastern Cooperative Oncology Group performance status; G8, Geriatric 8; IPI, International Prognostic Index; LDH, lactate dehydrogenase; OR, odds ratio; ULN, upper limit of normal

**Supplementary table 3. Multivariate logistic regression analysis for clinical factors associated with the occurrence of severe adverse events**

|                            | IPI                 |                | IPI factors         |                |
|----------------------------|---------------------|----------------|---------------------|----------------|
|                            | OR (95% CI)         | <i>P</i> value | OR (95% CI)         | <i>P</i> value |
| Male sex                   | 1.110 (0.714–1.720) | 0.649          | 1.050 (0.669–1.640) | 0.841          |
| IPI score                  | 1.150 (0.932–1.410) | 0.194          |                     |                |
| Age                        |                     |                | 0.972 (0.935–1.010) | 0.167          |
| ECOG PS $\geq$ 2           |                     |                | 1.880 (1.040–3.400) | 0.038          |
| LDH >ULN                   |                     |                | 0.657 (0.386–1.120) | 0.122          |
| Stage $\geq$ 3             |                     |                | 1.000 (0.572–1.760) | 0.994          |
| Extranodal sites $\geq$ 2  |                     |                | 1.700 (1.000–2.890) | 0.049          |
| Serum albumin (g/dL)       | 0.690 (0.479–0.994) | 0.047          | 0.692 (0.477–1.000) | 0.053          |
| Bulky mass                 | 1.910 (1.060–3.460) | 0.318          | 1.830 (0.997–3.380) | 0.051          |
| Total ARDI                 | 1.000 (0.996–1.010) | 0.380          | 1.000 (0.996–1.010) | 0.409          |
| Modified-G8 score (/point) | 0.908 (0.829–0.995) | 0.038          | 0.892 (0.806–0.987) | 0.046          |
| CCI score (/point)         | 1.190 (1.020–1.380) | 0.024          | 1.120 (0.961–1.300) | 0.147          |

ARDI, average relative dose intensity; CCI, Charlson Comorbidity Index; CI, confidence interval; ECOG PS, Eastern Cooperative Oncology Group performance status; G8, Geriatric 8; IPI, International Prognostic Index; LDH, lactate dehydrogenase; OR, odds ratio; ULN, upper limit of normal
